# Supplementary figures and images for: On the use of haplotype phylogeny to detect disease susceptibility loci
Source: Springer Nature journal article supplement (doi:10.1186/1471-2156-6-24), 2005-05-18

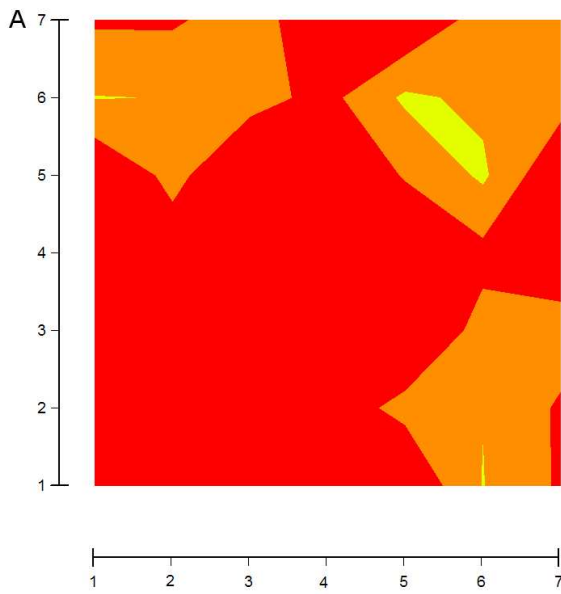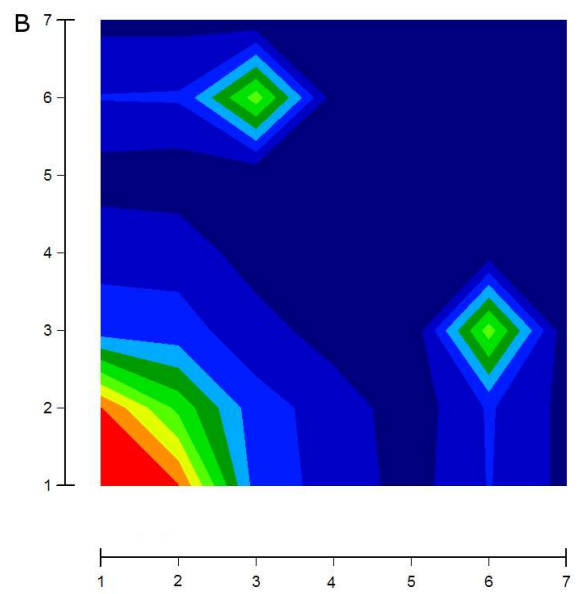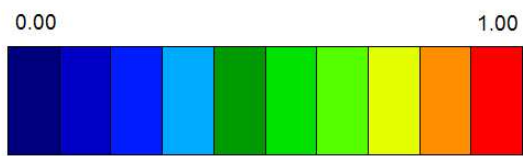

Supplement: Additional file 3 [file 1471-2156-6-24-s3.pdf]
